# Supplementary material for: Supramolecular Switch for the Regulation of Antibacterial Efficacy of Near-Infrared Photosensitizer
Source: MDPI journal article supplement (doi:10.3390/molecules29051040), 2024-02-28
Supplement: s1 [file s1]

# ***Supporting Information***

## **Supramolecular Switch for the Regulation of Antibacterial Efficacy of Near-Infrared Photosensitizer**

**Yu-Na Jiang**<sup>1,2</sup>, **Manqi Tan**<sup>1,2</sup>, **Chenglong He**<sup>1,2</sup>, **Jiaxi Wang**<sup>3</sup>, **Yi Wei**<sup>3</sup>, **Ningning Jing**<sup>4</sup>, **Bing Wang**<sup>2,5</sup>, **Fang Yang**<sup>1,2,5,\*</sup>, **Yujie Zhang**<sup>1,2,5,\*</sup> and **Meng Li**<sup>2,5,\*</sup>

<sup>1</sup> Cixi Biomedical Research Institute, Wenzhou Medical University, Ningbo 315302, China;

jiangyuna@nimte.ac.cn (Y.-N.J.); tanmanqi@nimte.ac.cn (M.T.); hechenglong@nimte.ac.cn (C.H.)

<sup>2</sup> Ningbo Key Laboratory of Biomedical Imaging Probe Materials and Technology, Ningbo Institute of Materials Technology and Engineering, Chinese Academy of Sciences, Ningbo 315201, China; wangbing@nimte.ac.cn

<sup>3</sup> School of Materials Science and Engineering, University of Science and Technology Beijing, Beijing 100083, China; jiaxi0726@163.com (J.W.); weiyi5166@126.com (Y.W.)

<sup>4</sup> College of Science and Technology, Ningbo University, Ningbo 315300, China; jingnn7009@163.com

<sup>5</sup> Zhejiang International Scientific and Technological Cooperative Base of Biomedical Materials and Technology, Ningbo Cixi Institute of Biomedical Engineering, Ningbo 315300, China

\* Correspondence: yangf@nimte.ac.cn (F.Y.); zhangyujie@nimte.ac.cn (Y.Z.); limeng@nimte.ac.cn (M.L.)

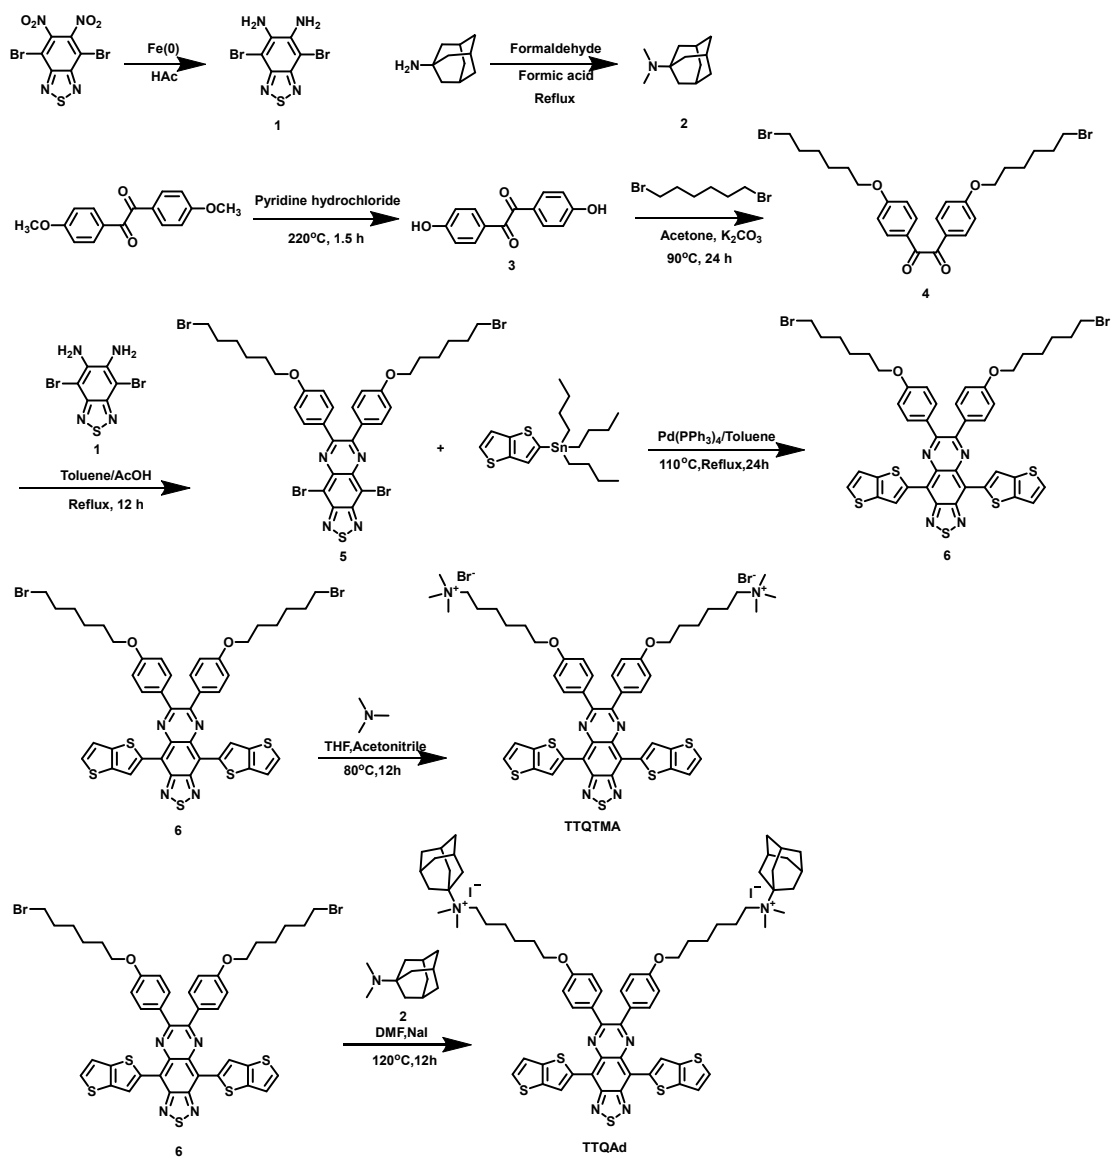

**Scheme S1.** The synthetic routes of TTQAd and TTQTMA.

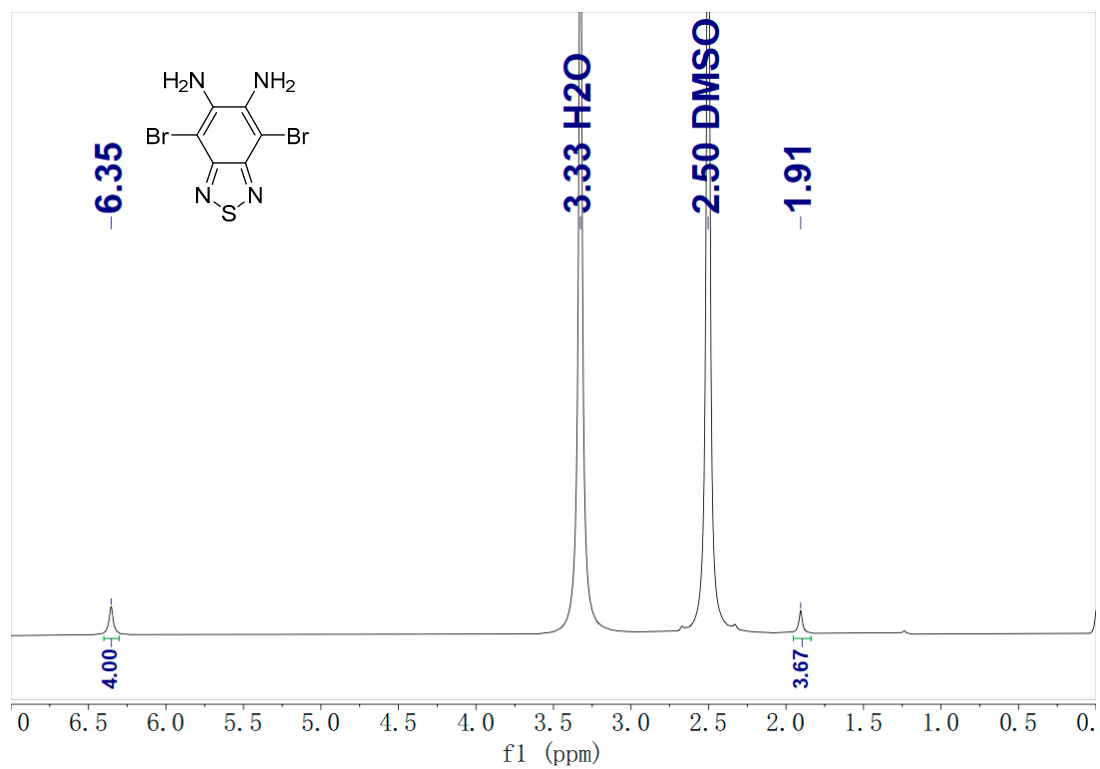

**Figure S1.**  $^1\text{H}$  NMR spectrum of 4,7-dibromo-2,1,3-benzothiadiazole-5,6-diamine (1) in DMSO.

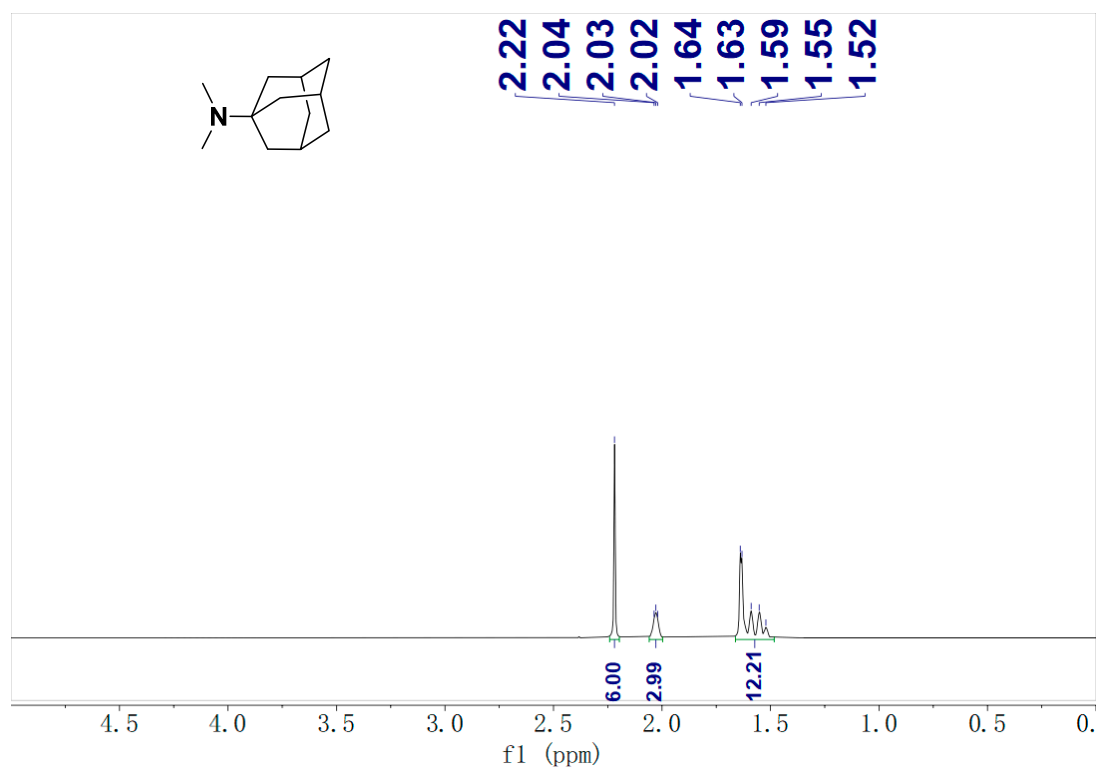

**Figure S2.**  $^1\text{H}$  NMR spectrum of dimethyl-1-adamantylamine (2) in  $\text{CDCl}_3$ .

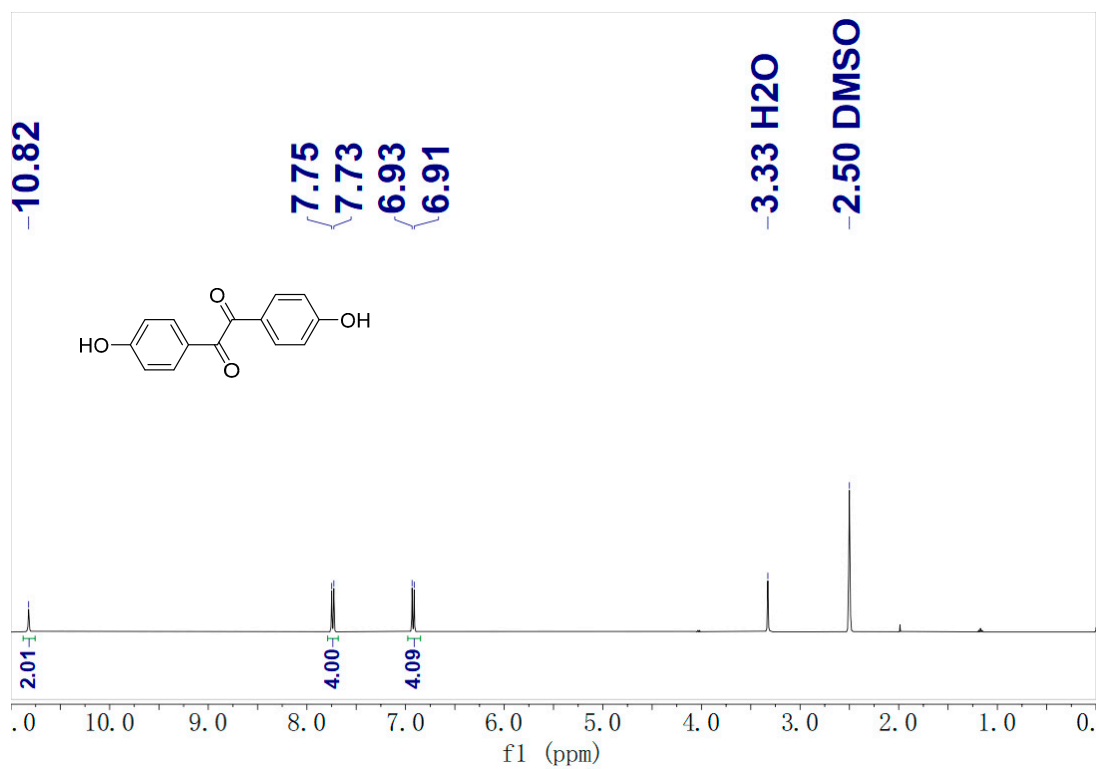

**Figure S3.**  $^1\text{H}$  NMR spectrum of 4,4'-dihydroxy-benzil (3) in DMSO.

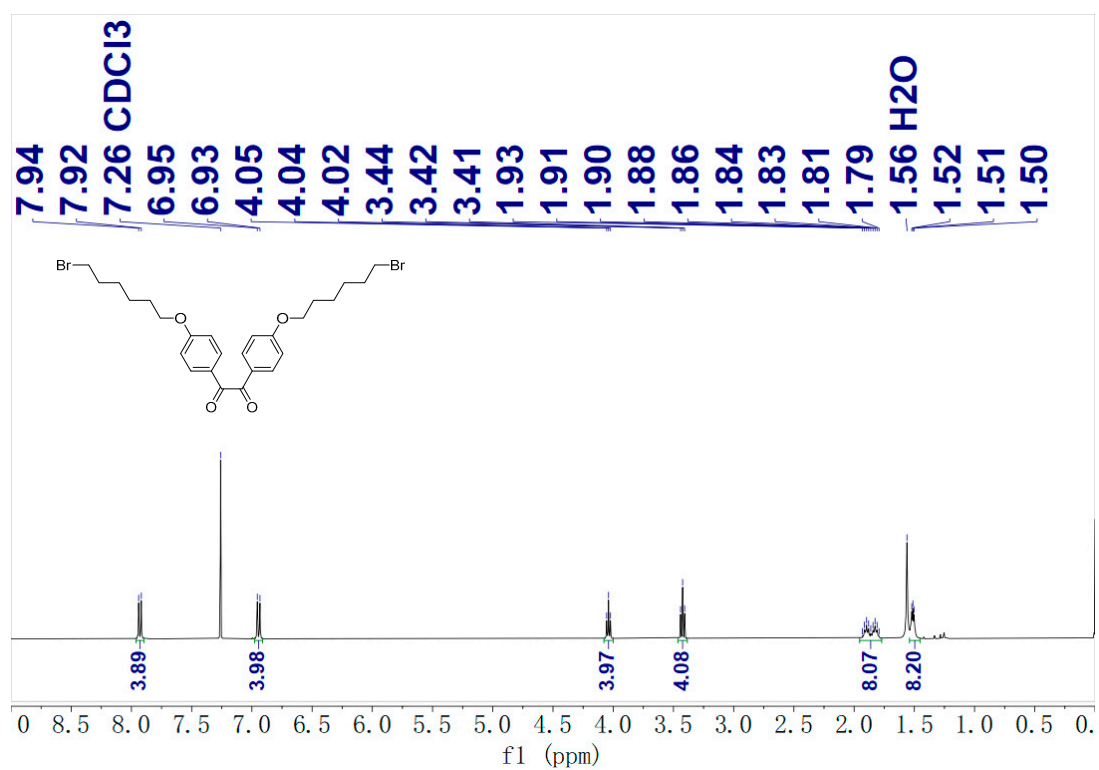

**Figure S4.**  $^1\text{H}$  NMR spectrum of compound 4 in DMSO.

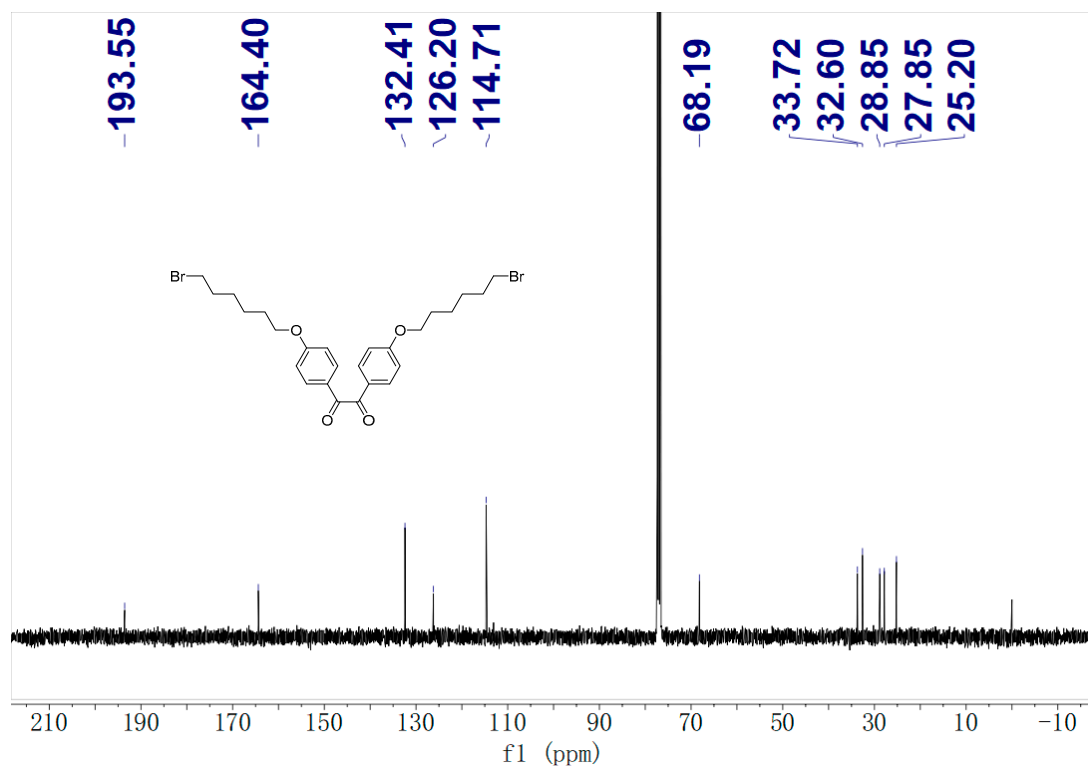

**Figure S5.** <sup>13</sup>C NMR spectrum of compound 4 in DMSO.

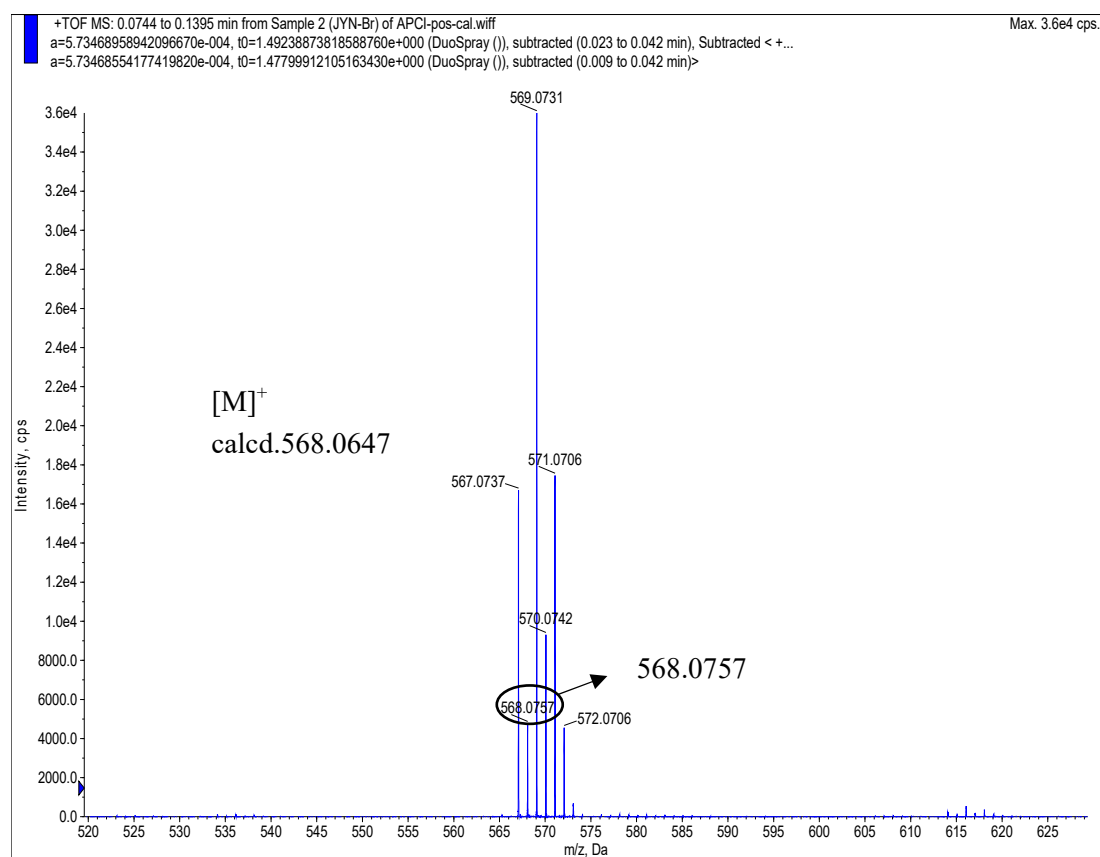

**Figure S6.** HRMS of Compound 4.

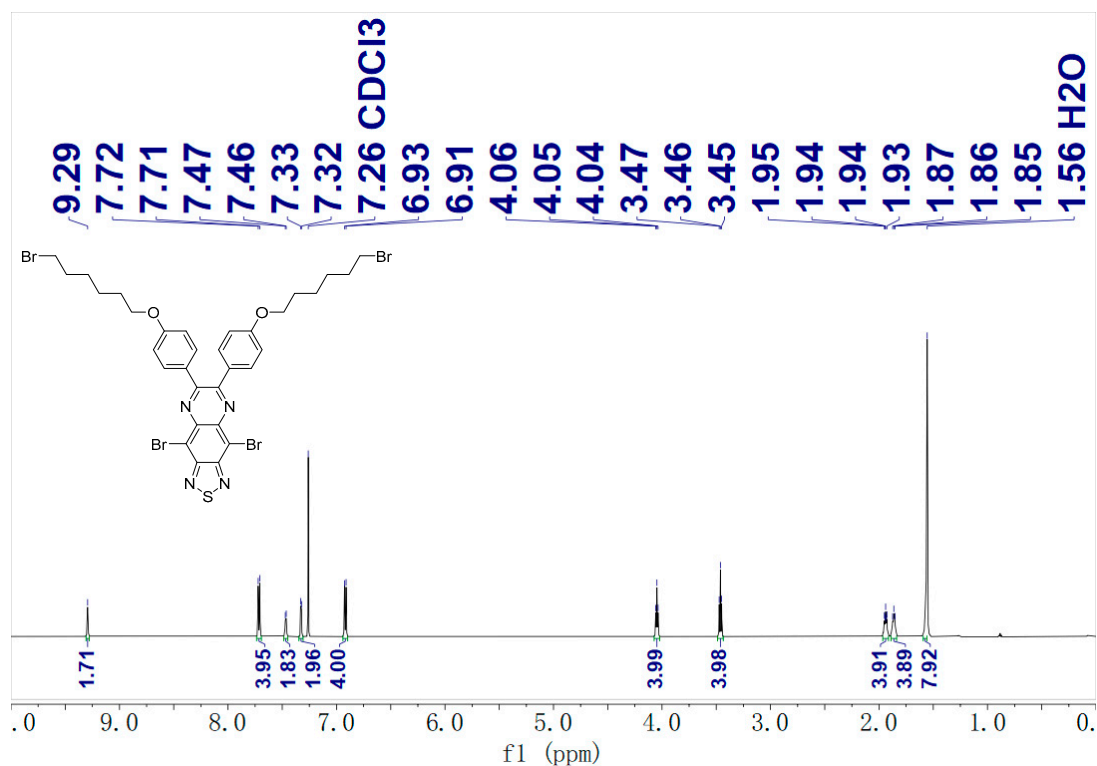

**Figure S7.** <sup>1</sup>H NMR spectrum of compound 5 in CDCl<sub>3</sub>.

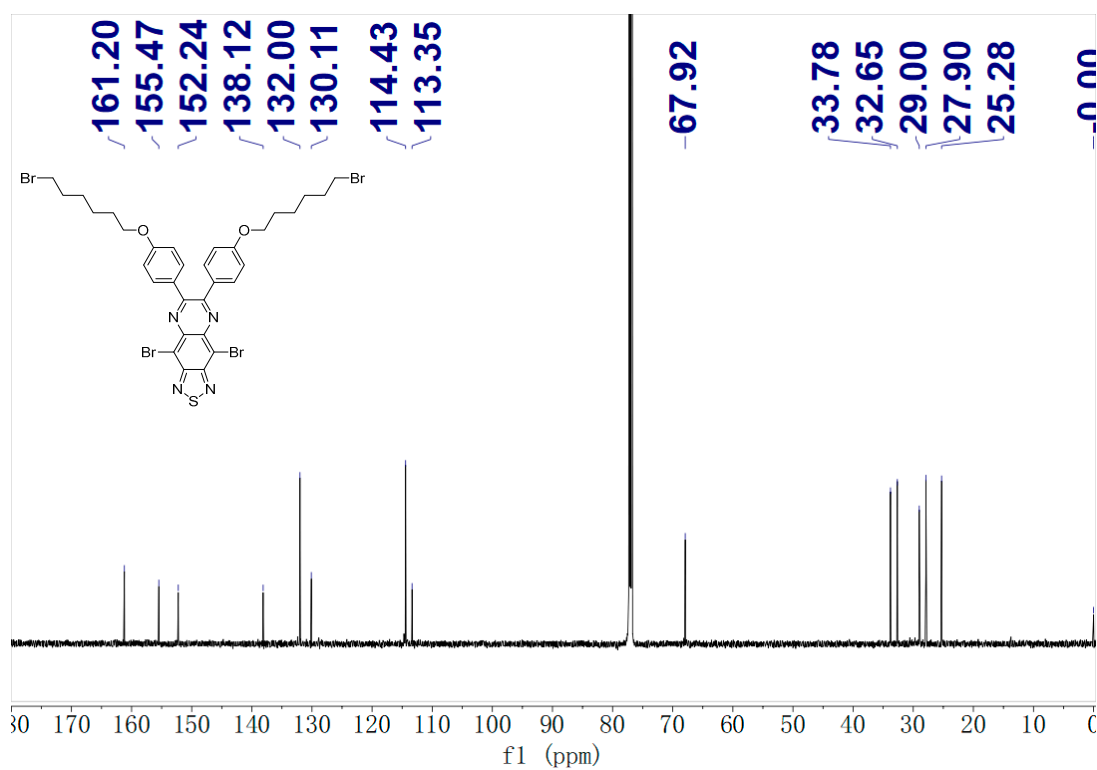

**Figure S8.** <sup>13</sup>C NMR spectrum of compound 5 in CDCl<sub>3</sub>.

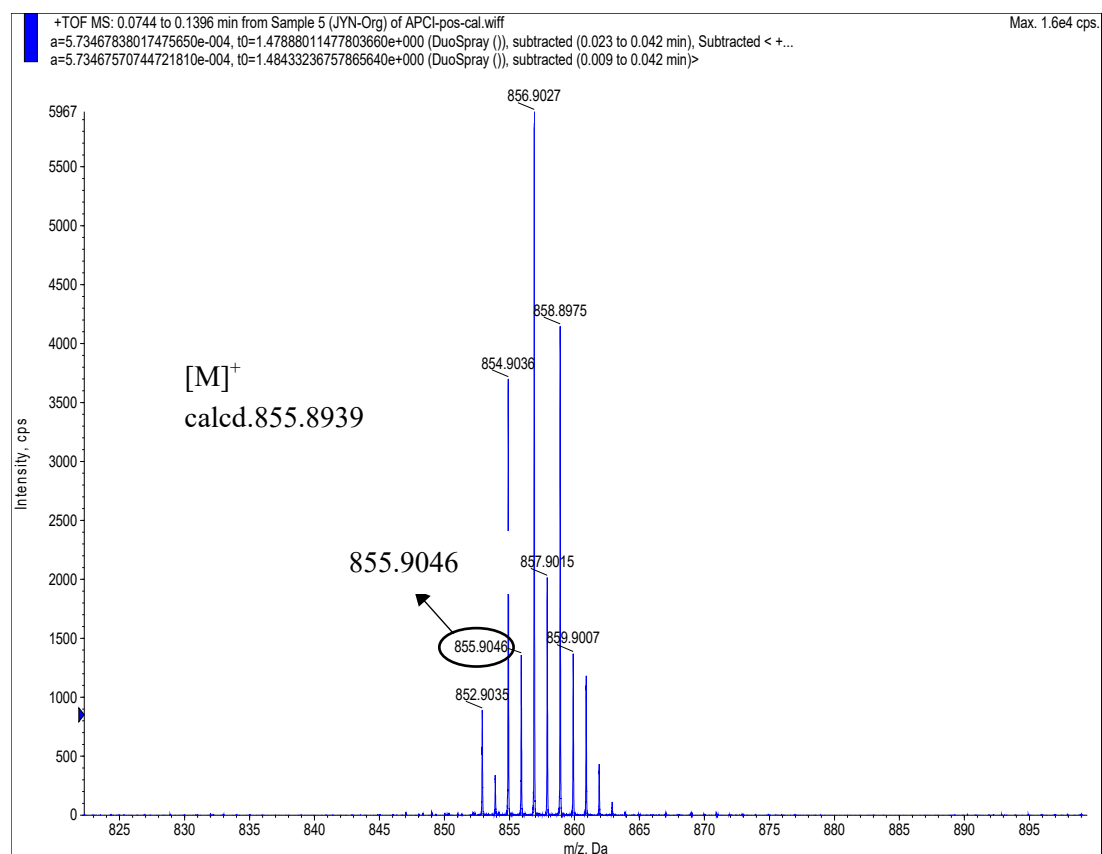

**Figure S9.** HRMS of compound 5.

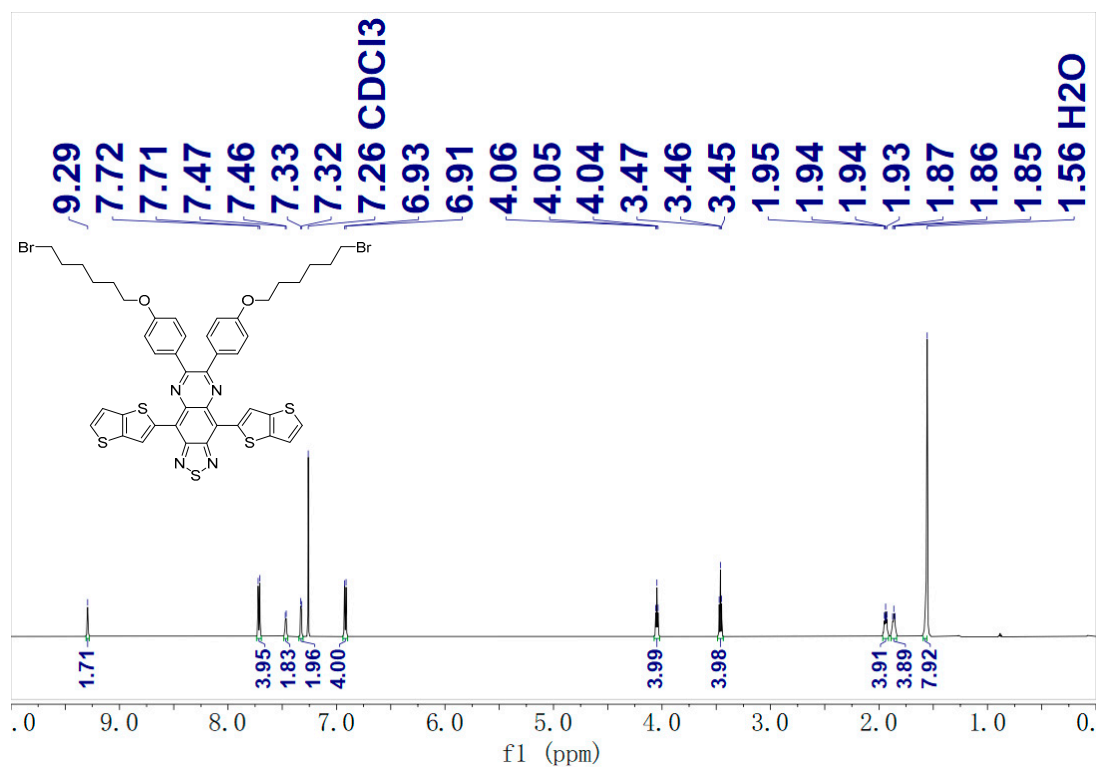

**Figure S10.** <sup>1</sup>H NMR spectrum of compound 6 in CDCl<sub>3</sub>.

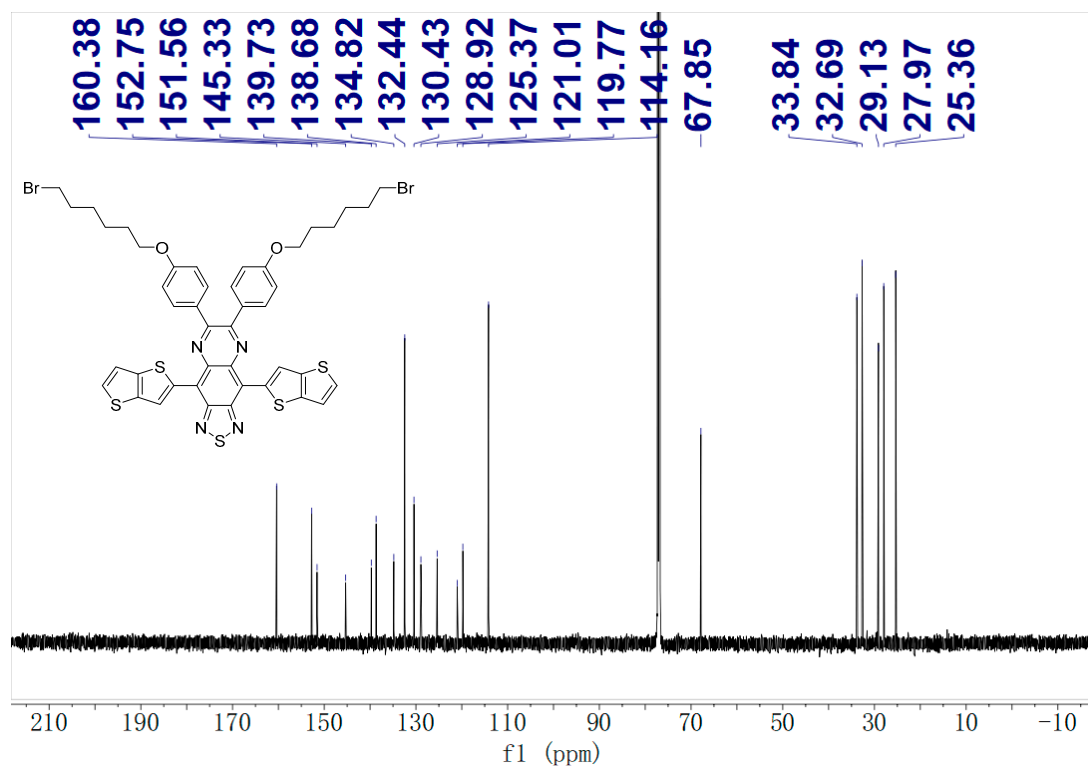

**Figure S11.** <sup>13</sup>C NMR spectrum of compound 6 in CDCl<sub>3</sub>.

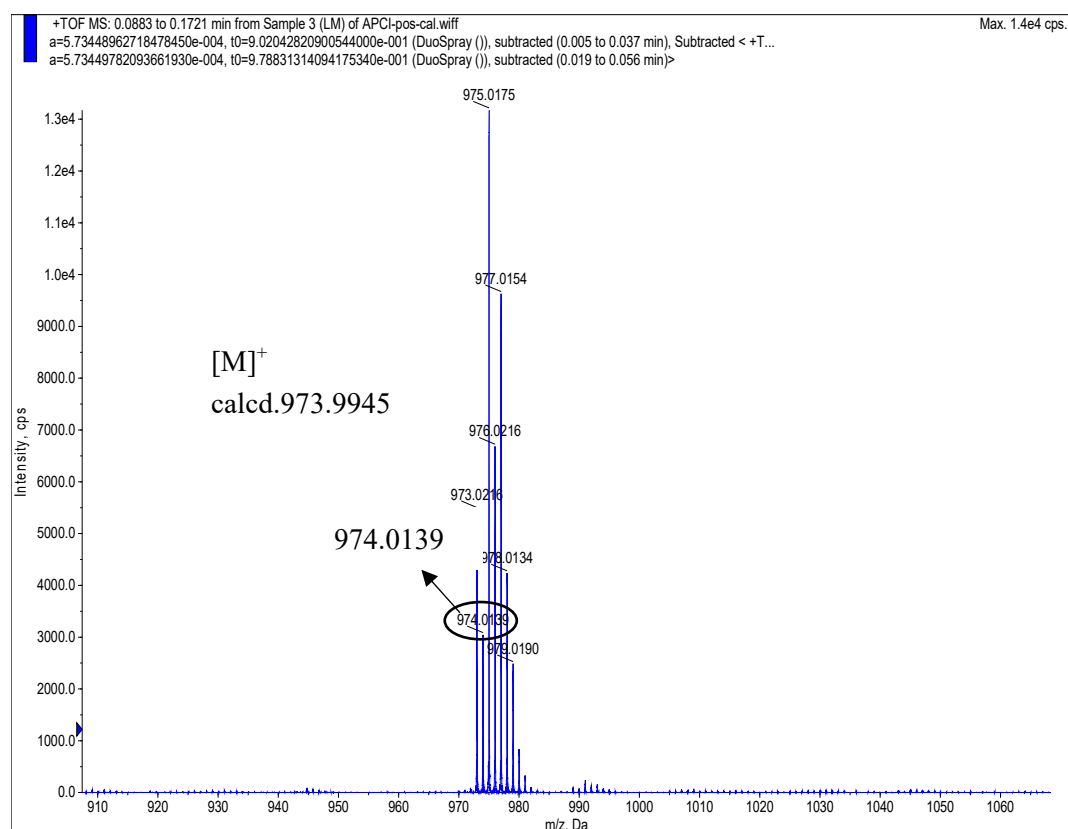

**Figure S12.** HRMS of compound 6.



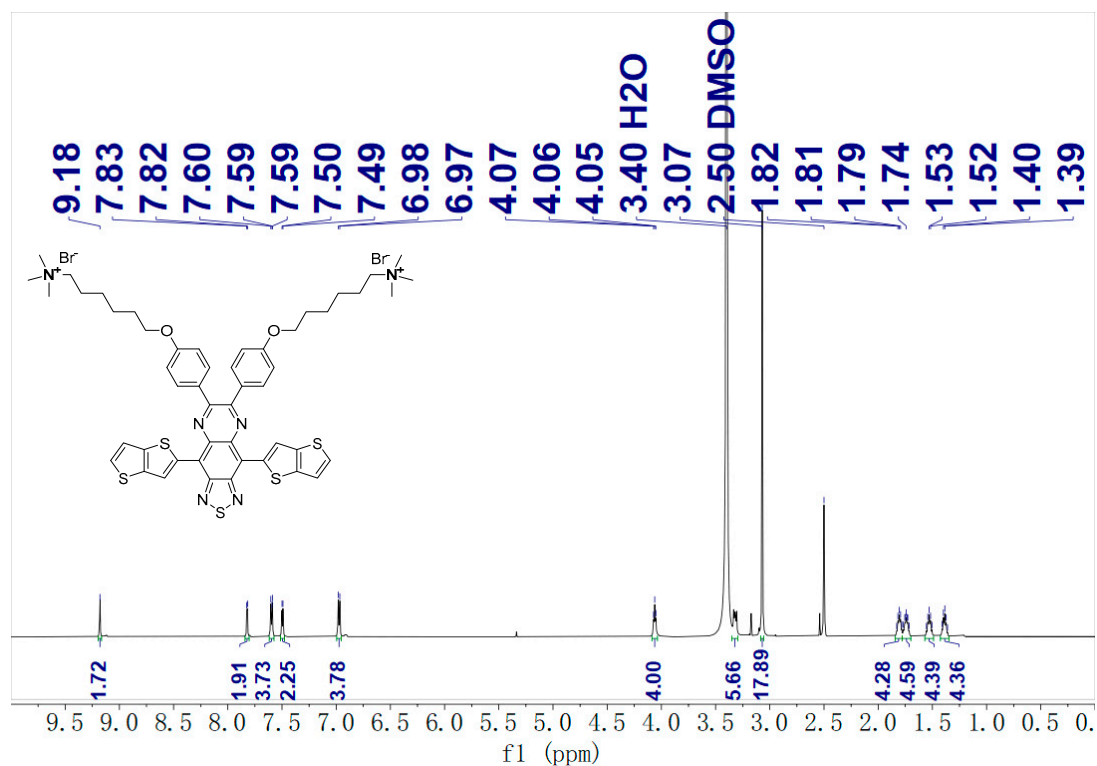

**Figure S13.**  $^1\text{H}$  NMR spectrum of TTQTMA in DMSO.

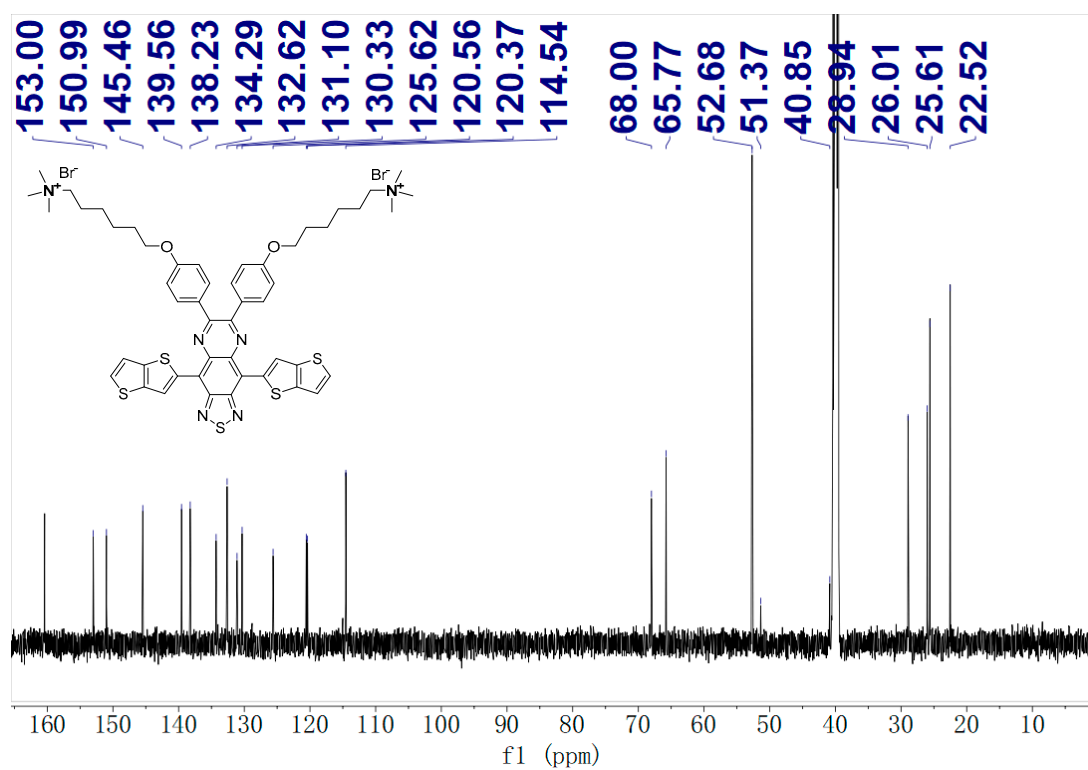

**Figure S14.**  $^{13}\text{C}$  NMR spectrum of TTQTMA in DMSO.

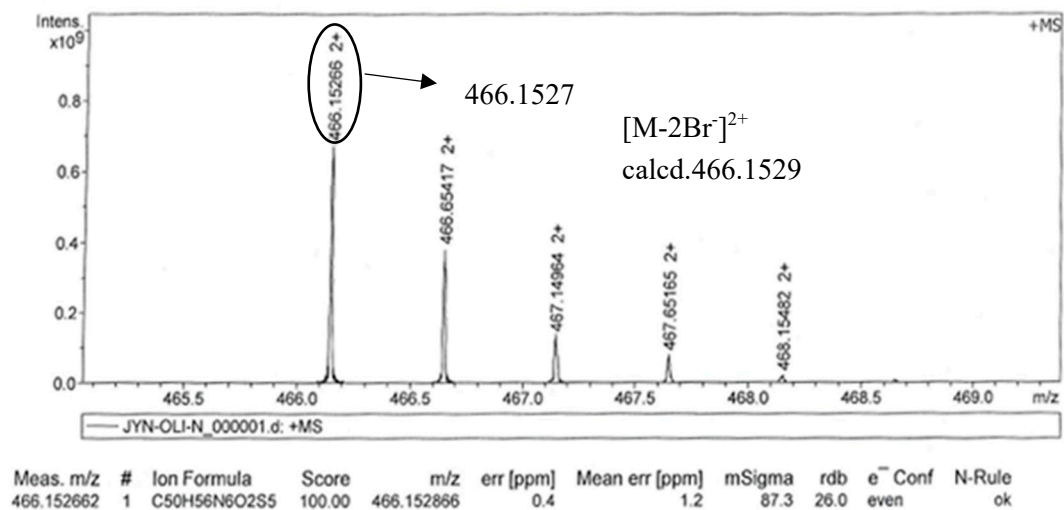

**Figure S15.** HRMS of TTQAd.

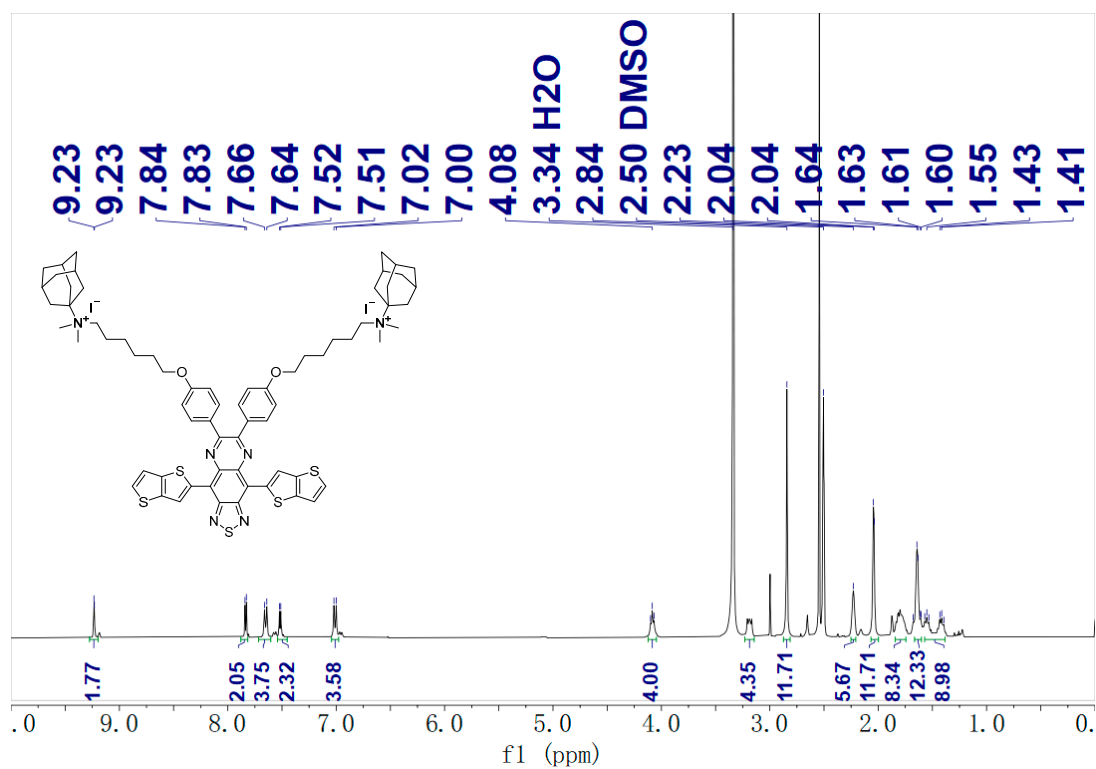

**Figure S16.** <sup>1</sup>H NMR spectrum of TTQAd in DMSO.

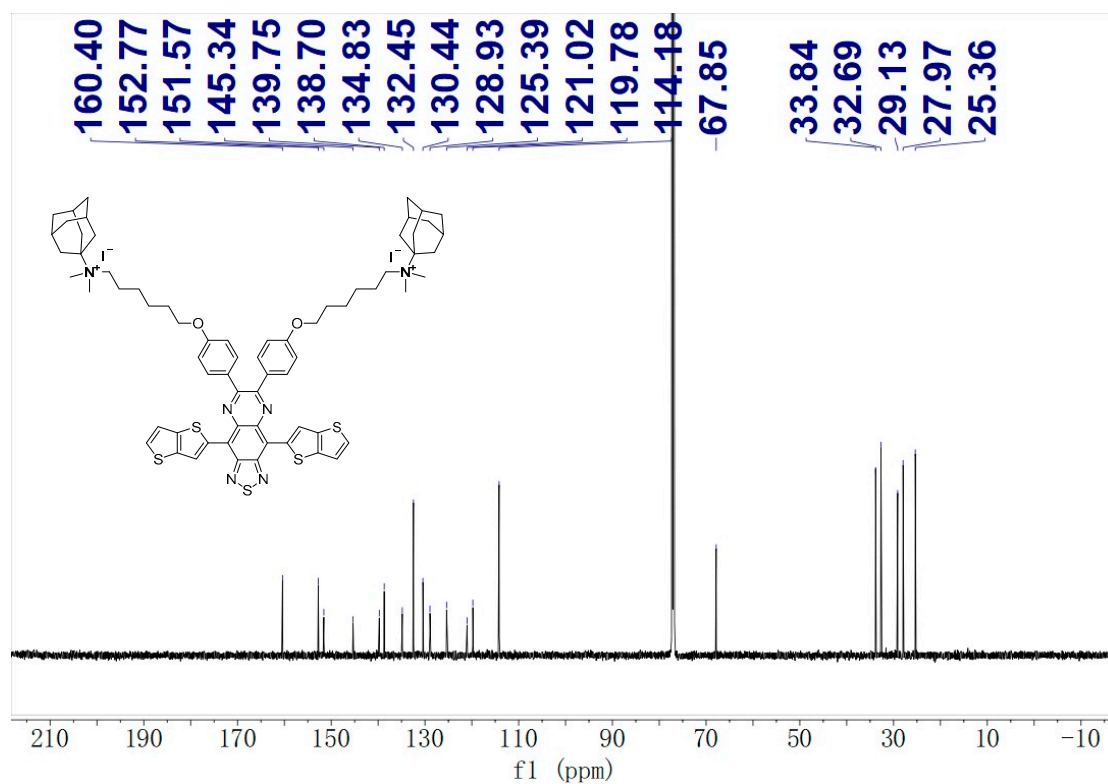

**Figure S17.**  $^{13}\text{C}$  NMR spectrum of TTQAd in DMSO.

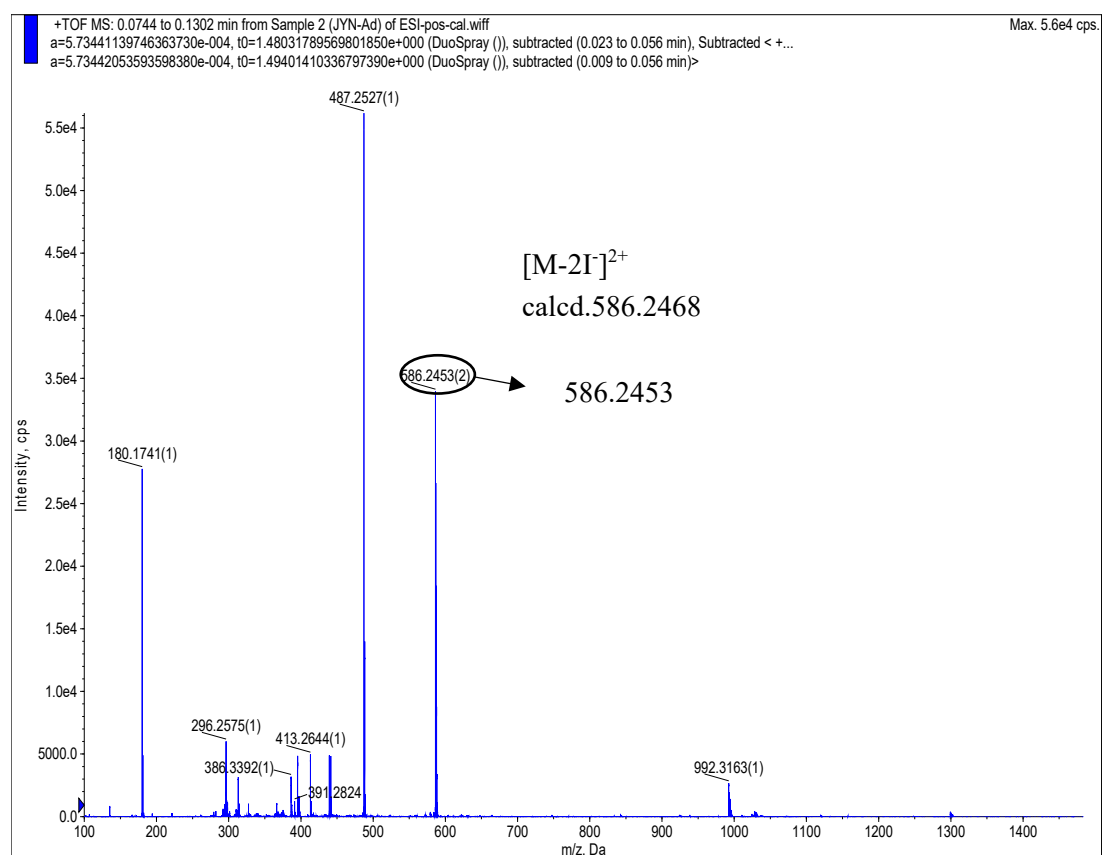

**Figure S18.** HRMS of TTQAd.

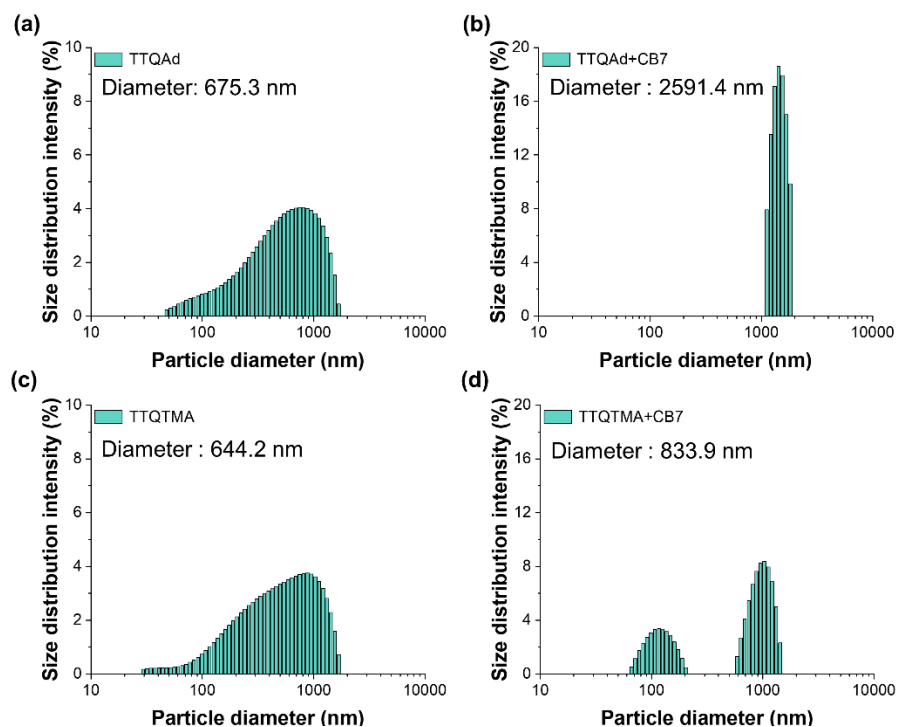

**Figure S19.** The hydrodynamic diameter histogram of TTQAd and TTQTMA before and after the addition of CB7. (TTQAd/TTQTMA: CB7= 1:2).

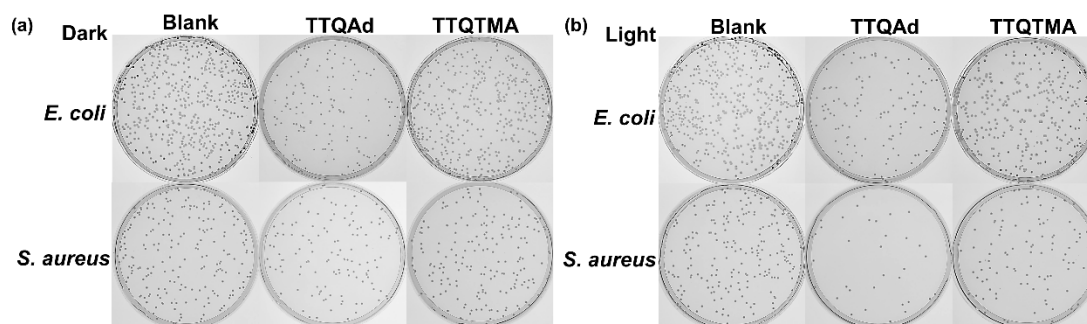

**Figure S20.** (a) The photographs of plate counting assay of *E. coli* and *S. aureus* treated with TTQAd/TTQTMA (20  $\mu$ M) in the dark. (b) The photographs of plate counting assay of *E. coli* and *S. aureus* treated with TTQAd/TTQTMA (20  $\mu$ M) followed by 808 nm laser irradiation (0.5 W cm<sup>-2</sup>, 10 min).

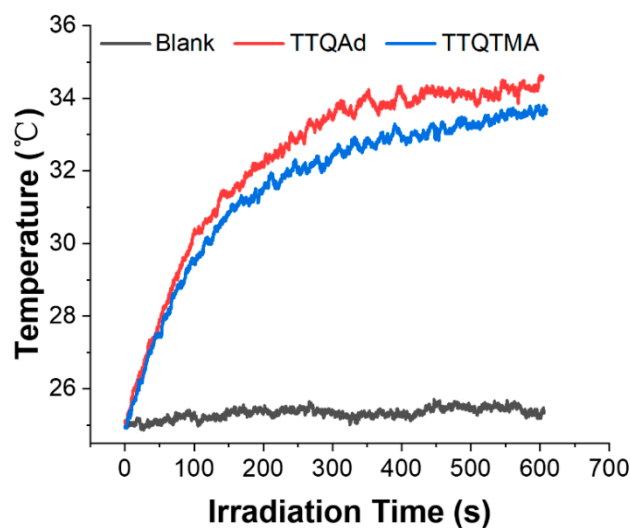

**Figure S21.** Photothermal conversion of TTQAd and TTQTMA in PBS (20  $\mu$ M) under 808 nm laser irradiation (0.5 W  $\text{cm}^{-2}$ , 10 min).

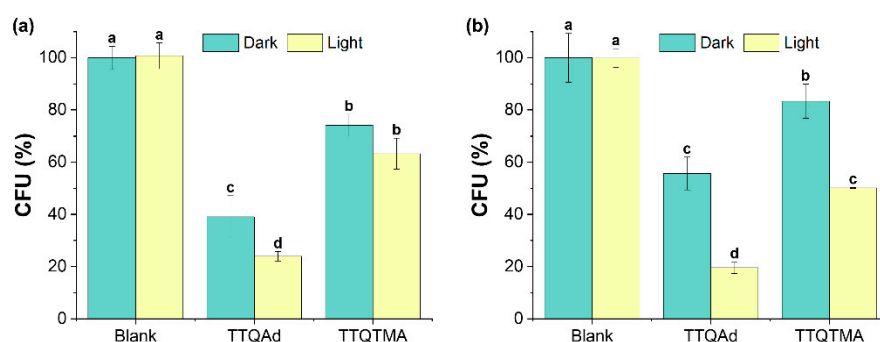

**Figure S22.** Bacterial viabilities of *E. coli* (a) and *S. aureus* (b) treated with TTQAd/TTQTMA (20  $\mu$ M) with/without 808 nm laser irradiation (0.5 W  $\text{cm}^{-2}$ , 10 min). Different letters (a, b, c, d) in the bar graphs represent significant difference at  $p < 0.05$  levels.

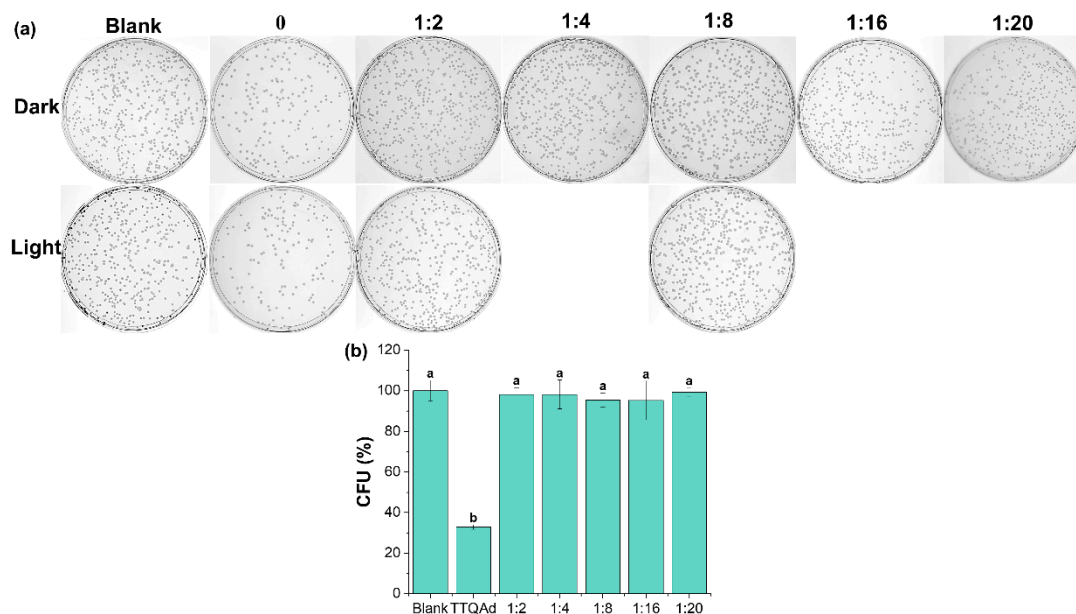

**Figure S23.** Photographs of *E. coli* colonies on agar plates (a) and bacterial viabilities of *E. coli* (b) treated with TTQAd before and after the addition of different amounts of CB7 with/without 808 nm laser irradiation ( $0.5 \text{ W cm}^{-2}$ ). [TTQAd] =  $20 \mu\text{M}$ , [CB7] = 0, 40, 80, 160, 320, 400  $\mu\text{M}$ . Different letters (a, b, c, d) represent significant difference at  $p < 0.05$  levels.

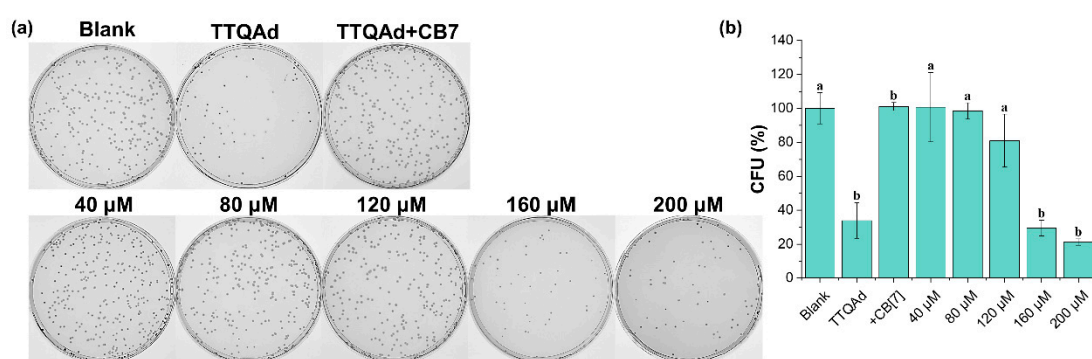

**Figure S24.** Photographs of *E. coli* colonies on agar plates (a) and bacterial viabilities of *E. coli* (b) treated with TTQAd-CB7 and different amounts of TMeAd. [TTQAd-CB7] =  $20 \mu\text{M}$ , [TMeAd] = 0, 40, 80, 120, 160, 200  $\mu\text{M}$ . Different letters (a, b) in the bar graph represent significant difference at  $p < 0.05$  levels.

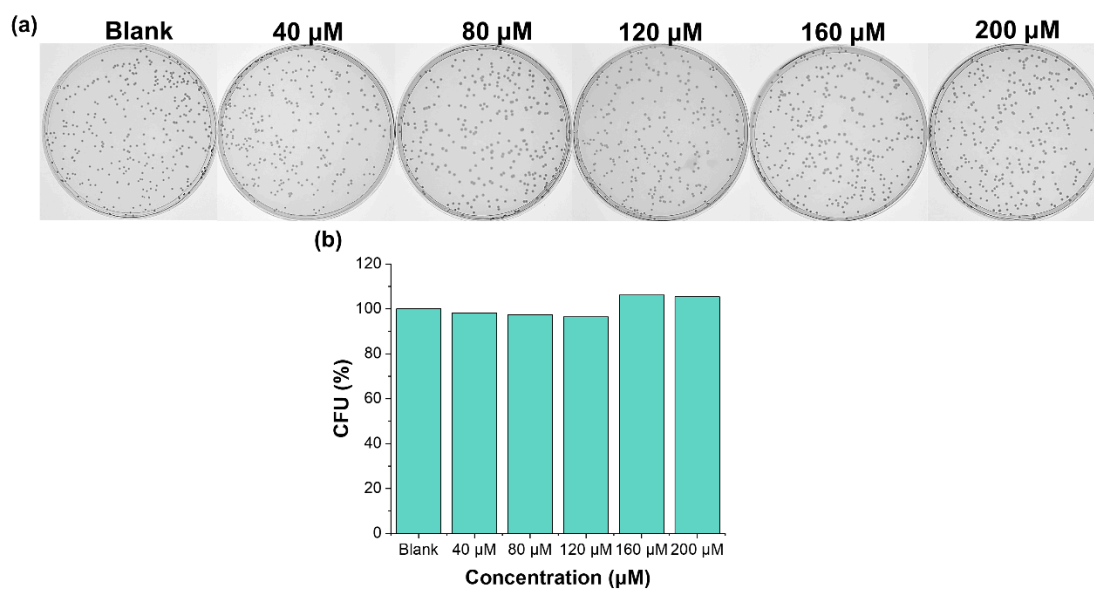

**Figure S25.** Photographs of *E. coli* colonies on agar plates (a) and bacterial viabilities of *E. coli* (b) treated with TMeAd. [TMeAd] = 0, 40, 80, 120, 160, 200  $\mu\text{M}$ .

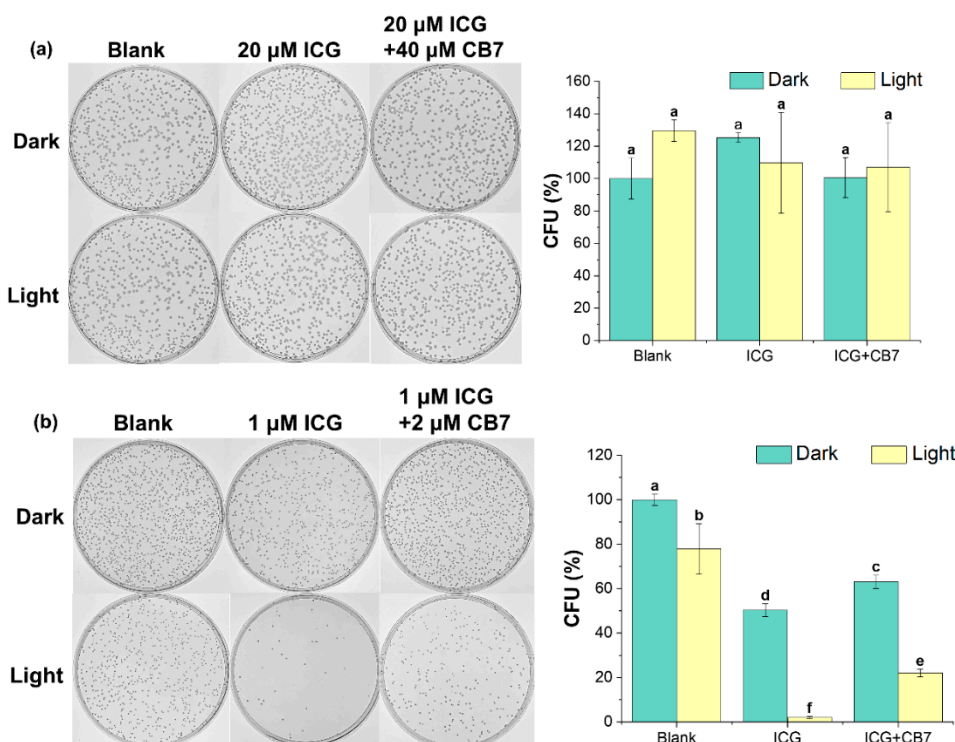

**Figure S26.** (a) Photographs of *E. coli* colonies on agar plates and bacterial viabilities of *E. coli* treated with ICG (20  $\mu\text{M}$ ) before and after the addition of CB7 (40  $\mu\text{M}$ ) with/without 808 nm laser irradiation (0.5 W  $\text{cm}^{-2}$ , 10 min); (b) Photographs of *S. aureus* colonies on agar plates and bacterial viabilities of *S. aureus* treated with ICG (1

$\mu\text{M}$ ) before and after the addition of CB7 ( $2\ \mu\text{M}$ ) with/without 808 nm laser irradiation ( $0.5\ \text{W cm}^{-2}$ , 10 min); Different letters (a, b, c, d) in the bar graphs represent significant difference at  $p < 0.05$  levels.

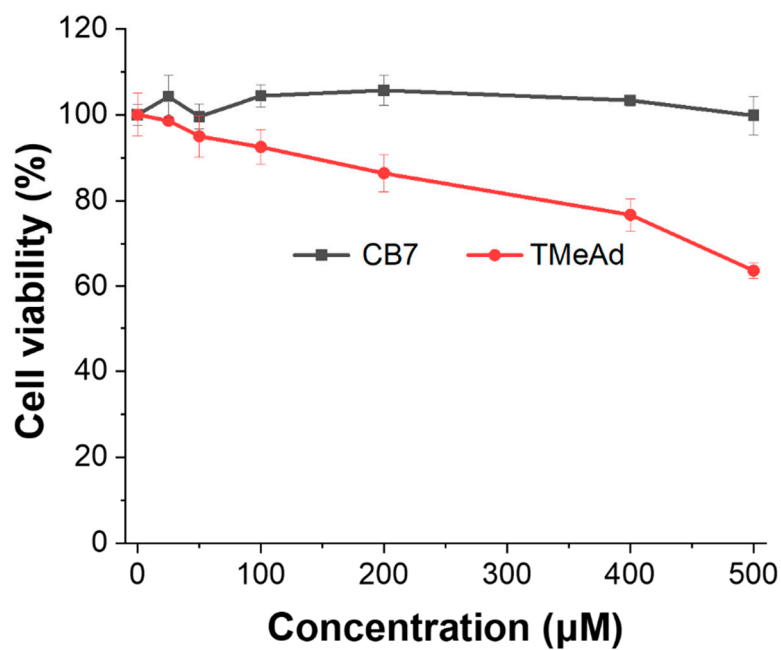

**Figure S27.** Cell viability after treating with CB7 and TMeAd at different concentrations in the absence of light.
